# Supplementary material
Source: Springer Nature journal article supplement (https://www.springermedizin.de/resource/supplementary/12987_2008_303_MOESM3_ESM.pdf/9611734)

**A**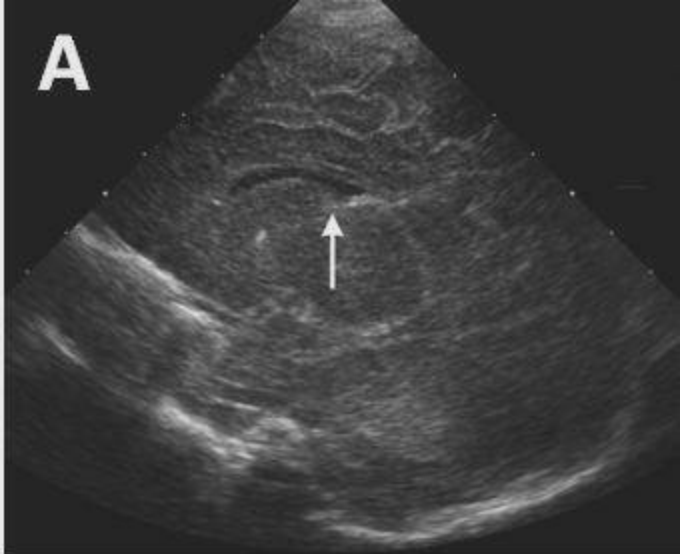**B**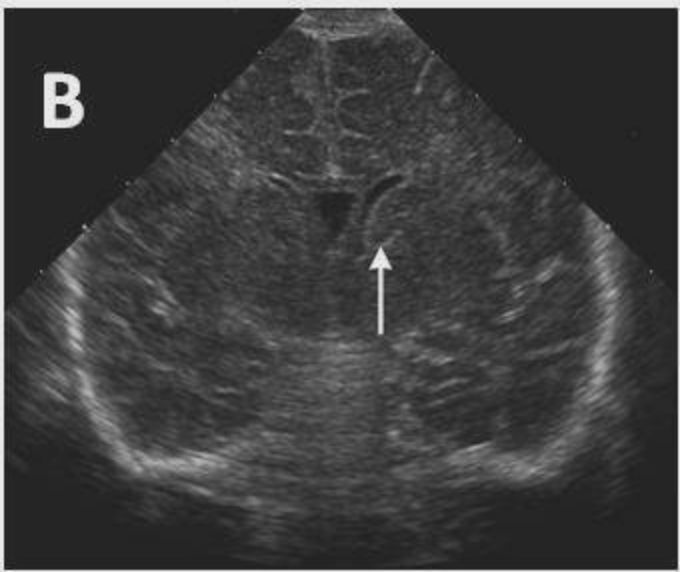

Supplement: MOESM3 [file 9611734]
